# Supplementary material for: A hybrid hydrogel with in situ formed Ag-nanoparticles within 3D networks that exhibits broad antibacterial activities
Source: Royal Society of Chemistry journal article supplement (doi:10.1039/d0nj01128b), 2020-01-01
Supplement: d0nj01128b1.pdf [file d0nj01128b1.pdf]

**Supporting Information for:**

**A hybrid hydrogel with in situ formed Ag-nanoparticles within 3D  
networks that exhibits broad antibacterial activities**

Chuan-Wan Wei,<sup>‡a,b</sup> Xiao-Qing Gong,<sup>‡a</sup> Xiao-Juan Wang,<sup>\*a,b</sup> Xin-Zhi Yang,<sup>c</sup> Shu-Qin Gao,<sup>c</sup> and  
Ying-Wu Lin<sup>a,b,c,\*</sup>

*a. School of Chemistry and Chemical Engineering, University of South China, Hengyang 421001,  
China.*

*b. Hunan Key Laboratory for the Design and Application of Actinide Complexes, University of  
South China, Hengyang, China*

*c. Laboratory of Protein Structure and Function, University of South China, Hengyang 421001,  
China.*

*Correspondence: 1052961032@qq.com (Dr. X.-J. Wang); ywlin@usc.edu.cn (Prof. Dr. Y.-W. Lin);*

*Tel. (+86) 743-8578079*

<sup>‡</sup> These authors contributed equally.

## Contents

### 1. Experimental Section

|                                              |      |
|----------------------------------------------|------|
| 1.1 Reagents                                 | p.S4 |
| 1.2 Synthesis of gelators                    | p.S4 |
| 1.3 Preparation of HAIP and Ag NPs-HAIP gels | p.S5 |
| 1.4 UV-Vis studies                           | p.S6 |
| 1.5 SEM, TEM, ESI-MS and NMR studies         | p.S6 |
| 1.6 Fluorescence studies                     | p.S6 |
| 1.7 Antibacterial activity studies           | p.S6 |
| 1.8 Cell cytotoxicity studies                | p.S7 |

### 2. Supplementary Figures

|                                                                                                                             |       |
|-----------------------------------------------------------------------------------------------------------------------------|-------|
| <b>Fig. S1.</b> Electrospray ionization mass spectra of HAIP.                                                               | p.S8  |
| <b>Fig. S2</b> <sup>1</sup> H NMR spectrum of HAIP in D <sub>2</sub> O.                                                     | p.S8  |
| <b>Fig. S3</b> The structure and the gelling behaviors of compound 2.                                                       | p.S9  |
| <b>Fig. S4</b> TEM images of HAIP and Ag NPs-HAIP xerogels.                                                                 | p.S9  |
| <b>Fig. S5</b> SEM images of HAIP and Ag NPs-HAIP xerogels.                                                                 | p.S9  |
| <b>Fig. S6</b> TEM images of Ag NPs-HAIP xerogels with different scale bars, and diameter histogram of Ag NPs.              | p.S10 |
| <b>Fig. S7</b> TEM images of Ag NPs-HAIP xerogels containing the different silver concentrations.                           | p.S11 |
| <b>Fig. S8</b> TEM images of Ag NPs-HAIP xerogels containing the same silver concentration (1 mM) formed at different time. | p.S11 |
| <b>Fig. S9</b> TEM images of (a) (L+D)-HAIP, (b) Ag NPs-(L+D)-HAIP xerogels.                                                | p.S12 |

- Fig. S10** Dynamic frequency sweep of fresh HAIP gel and Ag NPs-HAIP gel at their respective MGC, measured at 0.1% strain. p.S12
- Fig. S11** TG curves of HAIP, and Ag NPs-HAIP xerogels. p.S13
- Fig. S12** The step strain experimental data obtained from Ag NPs-HAIP gels at a constant frequency of 1 Hz. p.S13
- Fig. S13** Uv-vis absorption of deluted Ag NPs-HAIP xerogels formed at different time. p.S14
- Fig. S14** CD spectra of D-HAIP and Ag NPs-D-HAIP. p.S14
- Fig. S15** Electrospray ionization mass spectra of Ag NPs-HAIP. p.S15
- Fig. S16** The digital photos of colonies from *E. coli* (a) untreated, treated with (b) HAIP gel, (c) Ag NPs-HAIP. p.S15
- Fig. S17** The digital photos of colonies from *S.albus* (a) untreated, treated with (b) HAIP gel, (c) Ag NPs-HAIP, respectively, (d) Graphical representation of the OD measurements in *S.albus* at different time. p.S15
- Fig. S18** The digital photos of colonies from *S.aureus* (a) untreated, treated with (b) HAIP gel, (c) Ag NPs-HAIP. p.S16
- Fig. S19** Graphical representation of the OD measurements in *S.aureus* at different concentrations of Ag. p.S16
- Fig. S20** Graphical representation of the OD measurements in *E.coli*, *S.albus*, *S.aureus* at different concentrations. p.S17
- Fig. S21** Graphical representation of biocompatibility assays. p.S17

## 1. Experimental Section

### 1.1 Reagents

Tryptophan, *p*-Phthalaldehyde and sodium borohydride ( $\text{NaBH}_4$ ) were purchased from Aladin Reagent (Shanghai, China). These reagents were used without further purification. All other reagents were of analytical grade, which include  $\text{HNO}_3$ ,  $\text{KOH}$  and  $\text{AgNO}_3$ , *etc.* Deionized water (MillQ, 18.2 M $\Omega$ ) was used.

### 1.2 Synthesis of gelators

*The synthesis of compound 1:*

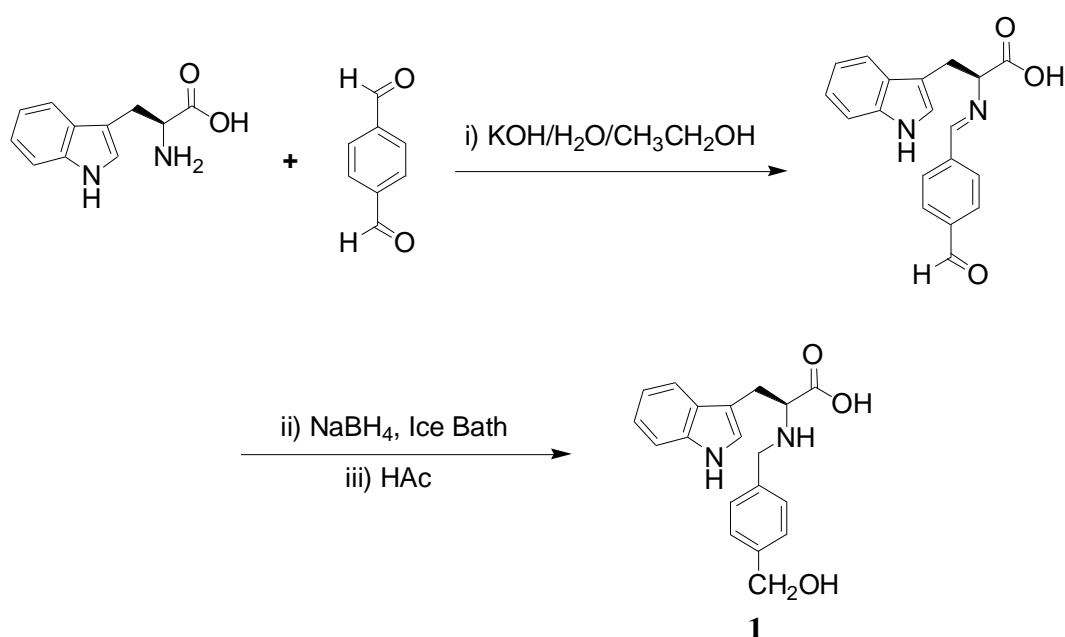

**Scheme S1:** Synthetic route of 1.

**Preparation of compound 1 (HAIP):** HAIP was prepared following a modified procedure in literature.<sup>1</sup> To an aqueous solution (10 mL) of L/D-Tryptophan (1 g, 5 mM) containing  $\text{KOH}$  (0.28 g, 5 mM), 1,4-Benzenedicarboxaldehyde Terephthalaldehyde (0.67 g, 5 mM) in ethanol (5 mL) was added slowly. The solution was stirred for 3 h at room temperature, and during this period the color of the solution was darker. Then the solution was cooled in an ice bath.  $\text{NaBH}_4$  (0.23 g, 6 mM) was added to the solution slowly. The mixture was stirred for 3 h, and 50% acetic acid was used to neutralize the basic (pH~10) reaction mixture and adjusted the pH to 4.0-5.0. The mixture system was stirred further for 3 h. The resulting solid was filtered off, and washed with ethanol and water, dried, and recrystallized from water/ethanol (3:1). Yield: 1.15 g, 68.9%.

<sup>1</sup>H NMR (500 MHz, (CD<sub>3</sub>)<sub>2</sub>SO, ppm): -CH<sub>2</sub> (1.88, s, 2H), -CH<sub>2</sub>OH (4.45, s, 2H), In-H and Phe-H (6.94-7.50, m, 10H), -NH(10.79, s, 1H), -COOH(10.89, s, 1H)  
MS (ESI): calc. for C<sub>19</sub>H<sub>20</sub>N<sub>2</sub>O<sub>3</sub> 324.15; observed 323.20 [M - H]<sup>-</sup>.

**The synthesis of compound 2:**

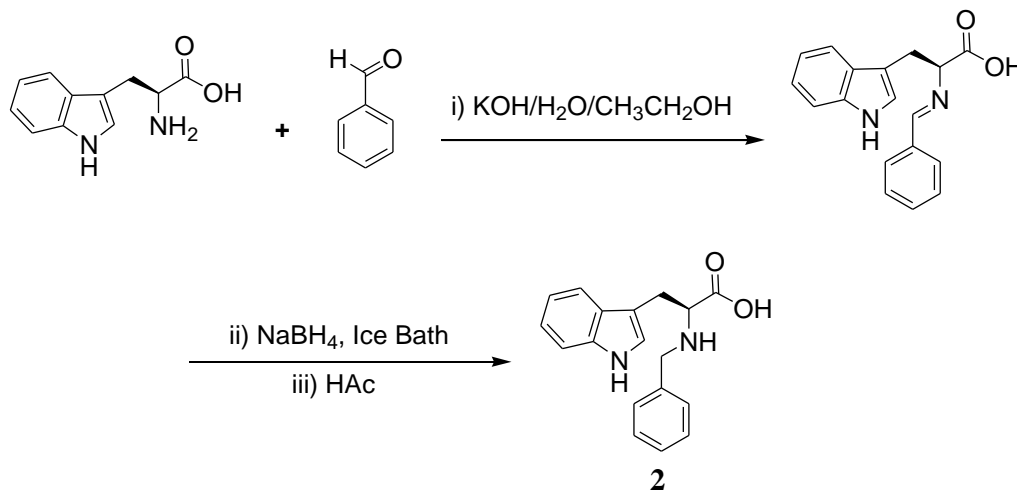

**Scheme S1:** Synthetic route of 2.

**Preparation of compound 2:** The synthetic procedure of compound 2 is similar to that of HAIP, except replacing 1,4-Benzenedicarboxaldehyde Terephthalaldehyde with benzaldehyde. Yield (compound 2): 1.2 g, 78.4%.

<sup>1</sup>H NMR (500 MHz, D<sub>2</sub>O, ppm): -CH<sub>2</sub> (2.82, d, 2H). -CH (3.17, t, J = 6.7 Hz, 1H), -CH<sub>2</sub> (3.55, d, 2H), In-H and Phe-H (6.94-7.44, m, 11H)

MS (ESI): calc. for C<sub>18</sub>H<sub>18</sub>N<sub>2</sub>O<sub>2</sub> 294.15; observed 293.35 [M - H]<sup>+</sup>.

### 1.3 Preparation of HAIP and Ag NPs-HAIP gels

#### HAIP gel preparation

Firstly, HAIP gelator was dissolved in a basic solution. And then, it was adjusted to moderate pH by addition of HNO<sub>3</sub>. White HAIP hydrogel was generated at pH 1-7 with the help of sonication after 40 minutes.

#### Ag NPs-HAIP hydrogel preparation

Ag NPs-HAIP hybrid hydrogel was prepared by mixing HAIP solution (pH 8-9) and silver nitrate solution, and the final concentrations of HAIP and Ag<sup>+</sup> were 10 mM and 1 mM, respectively. The

mixture was gradually changed into a yellow metallohydrogel under diffused sunlight at room temperature after several minutes.

#### ***1.4 UV-Vis studies***

UV-Vis spectral changes of the mixture of AgNO<sub>3</sub> and HAIP were monitored on a Hewlett-Packard 8453 diode array spectrometer within 20 min.

#### ***1.5 SEM, TEM, ESI-MS and NMR studies***

Scanning electron microscope (SEM) images were obtained on a FEI HELIOS NanoLab 600i SEM (America). Transmission electron microscope (TEM) images were obtained from a FEI Titan microscope (America). The mass spectrum measurements of HAIP and Ag NPs-HAIP were obtained by using Xevo G2-XS QToF mass spectrometer (Waters, America). NMR experiments were performed by using AMX-500 (Bruker, Switzerland).

#### ***1.6 Fluorescence spectral studies***

Fluorescence spectral measurements of HAIP and Ag NPs-HAIP were performed on a Fluorescence spectrometer (F-7000, Hitachi). ( $C_{\text{HAIP}} = 2 \text{ mM}$ ,  $C_{\text{Ag}} = 0.2 \text{ mM}$ ,  $\lambda_{\text{ex}} = 305 \text{ nm}$ ).

#### ***1.7 Antibacterial activity studies:***

The Escherichia coli (*E. coli*), *S. albus* and *S. aureus* strains were applied to evaluate the antibacterial activity of Ag NPs-containing hybrid hydrogels. Addition of 1.0 g peptone, 0.5 g yeast extract and 1.0 g sodium chloride to a beaker, the mixture was dissolved in ultrapure water and was transferred to conical flask with sodium hydroxide to adjust pH to 7.4, and diluted with ultrapure water to 100 mL. Thus, a liquid medium was finished. In the same way, 2.4 g agar was added to prepare a solid medium. These mediums were tightly sealed and then autoclaved at 110 °C for 30 minutes. The shaking flask method was used to investigate the antibacterial ability of the as-prepared materials.

In sterile conditions, 100 µL of cryopreservation bacterial suspension (4 °C) and 8.9 mL liquid medium were dispersed into 3 centrifuge tubes. 1.0 mL of HAIP gels, Ag NPs-HAIP gels, and ultrapure water were added into the above centrifuge tubes, respectively. The untreated bacteria

were used as the control group. These mixtures were shaken up and were incubated in the constant temperature air shock incubator at 37 °C for 3 h. The following step was to melt the solid medium; 10 mL of the solid medium was taken into 3 culture dishes before solidification, respectively. 10 µL of mixed bacterial suspension was taken out from centrifuge tubes and was inoculated evenly to the solid medium. After solidification of the culture medium, the solid medium was turned over and cultured at 37 °C to form bacterial colonies for 24 h. Finally, the growth of the strains was photographed and examined under a microscope.

### ***1.8 Cell cytotoxicity studies:***

The cytotoxicity in cell was obtained using a standard methyl thiazolyl tetrazolium 17 (MTT) assay in MCF7 living cell lines. The MCF7 cell were seeded into a 96-well cell culture plate. HAIP, Ag NPs-HAIP, with different concentrations (0, 50, 75, 100, 200, 300 µM, respectively), were injected to the wells of the treatment group, and the cells were incubated for 24 hours at 37 °C. The MTT solution was further added to each well of the 96-well assay plate, and continued to incubate for 4 h. In addition, we assessed the cell viability at different concentrations (0.2 mg/mL, 0.6 mg/mL, 1 mg/mL, 2 mg/mL, 5 mg/mL, 10 mg/mL, 20 mg/mL). An enzyme-linked immunosorbent assay (ELISA) reader (infinite M200, Tecan, Austria) was utilized to obtain the OD 490 (absorbance value) of each well.





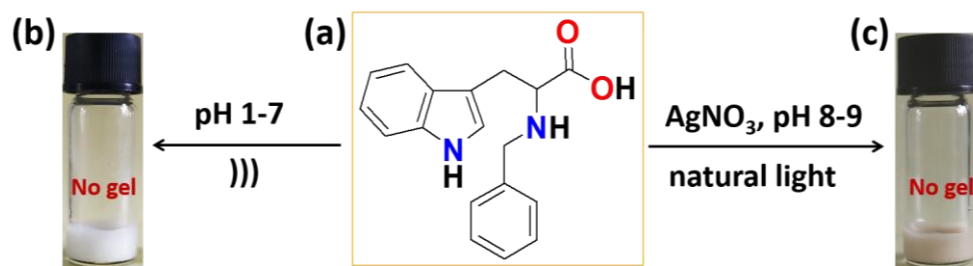

**Fig. S3** (a) The structure of compound 2, the gelling behaviors of (b) compound 2, (c) compound 2-AgNO<sub>3</sub>.

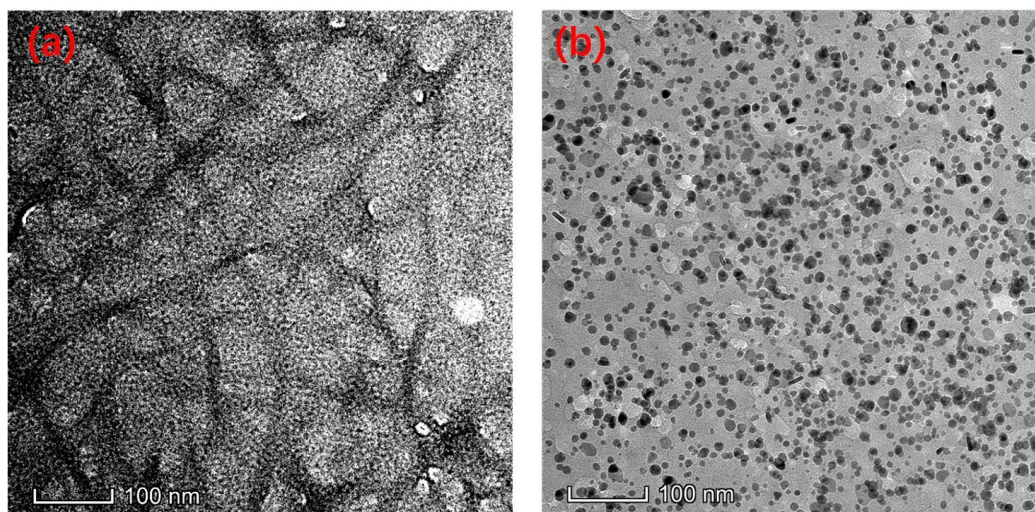

**Fig. S4** TEM images of HAIP and Ag NPs-HAIP xerogels.

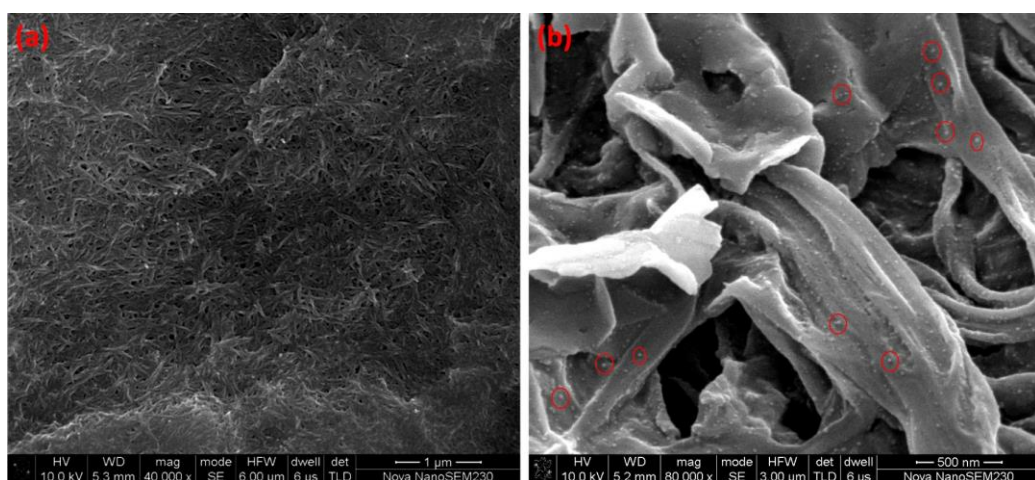

**Fig. S5** SEM images of HAIP and Ag NPs-HAIP xerogels.

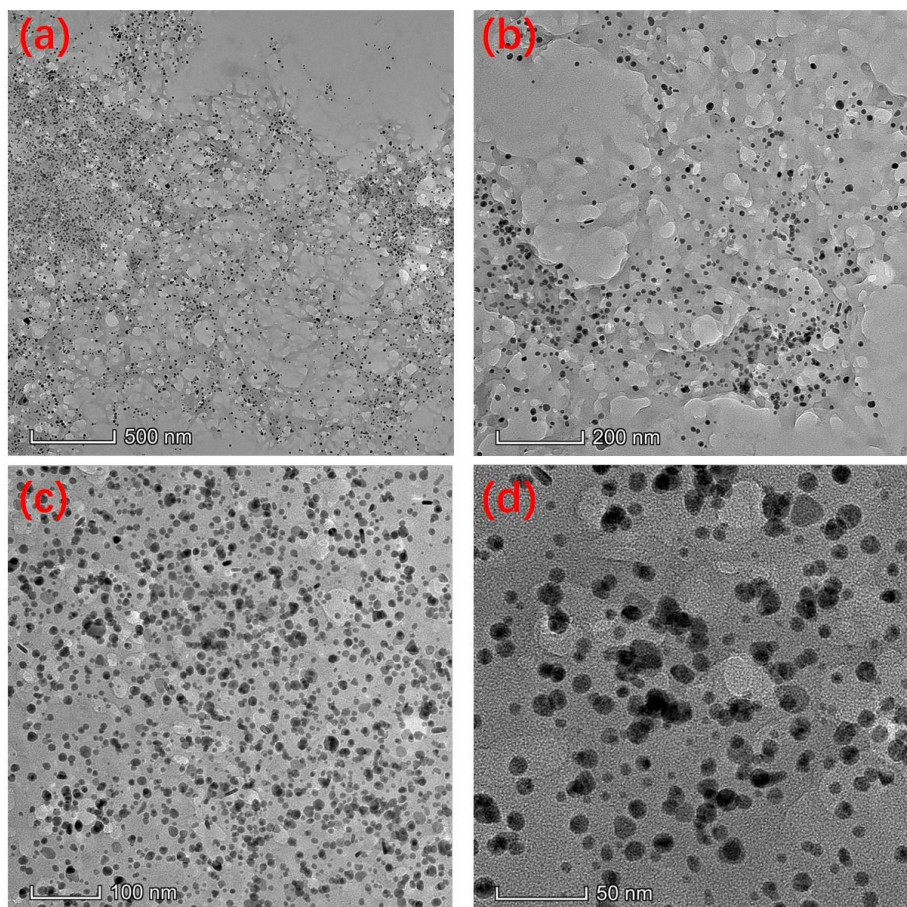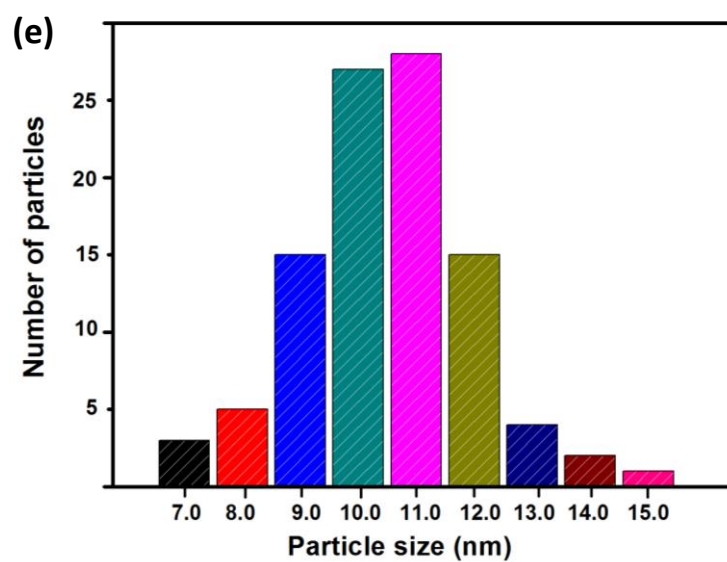

**Fig. S6** TEM images of (a-d) Ag NPs-HAIP xerogels (scale bars are (a) 500 nm, (b) 200 nm, (c) 100 nm, (d) 50 nm, respectively), and (e) diameter histogram of Ag NPs.

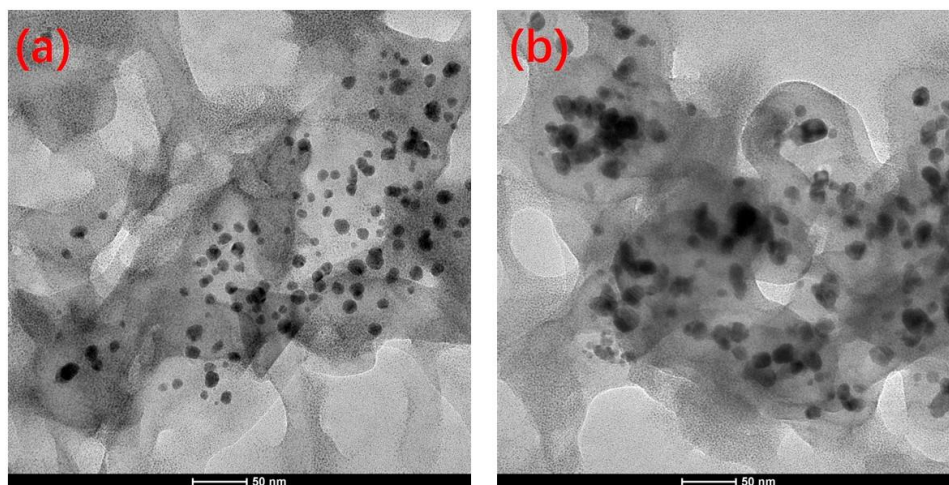

**Fig. S7** TEM images of Ag NPs-HAIP xerogels containing the different silver concentrations ((a) 1 mM, (b) 5 mM, respectively).

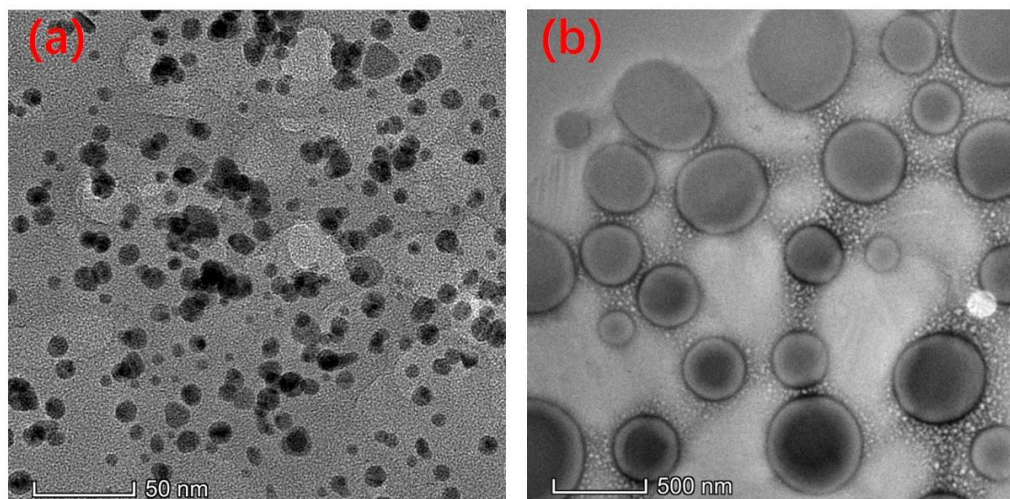

**Fig. S8** TEM images of Ag NPs-HAIP xerogels containing the same silver concentration (1 mM) formed at (a) 15 min, (b) one week.

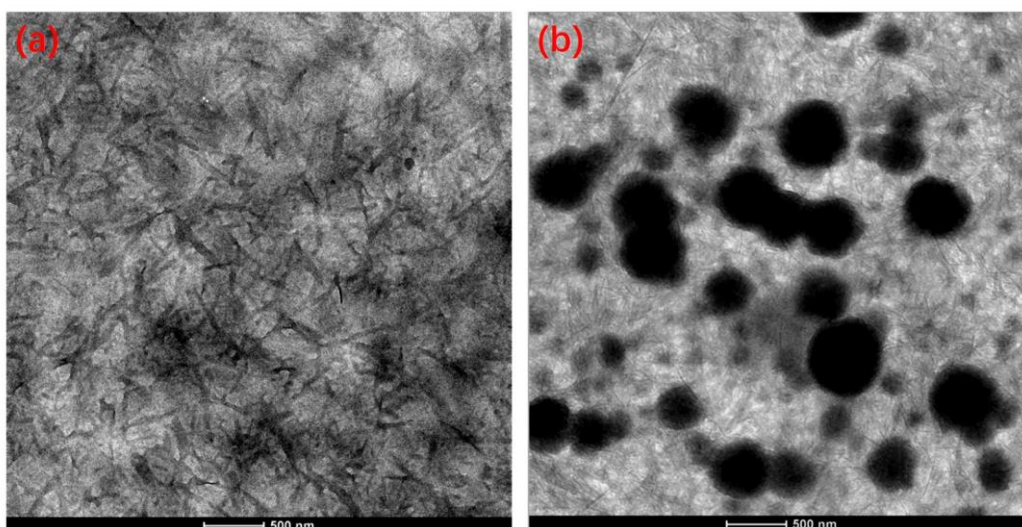

**Fig. S9** TEM images of (a) (L+D)-HAIP, (b) Ag NPs-(L+D)-HAIP xerogels.

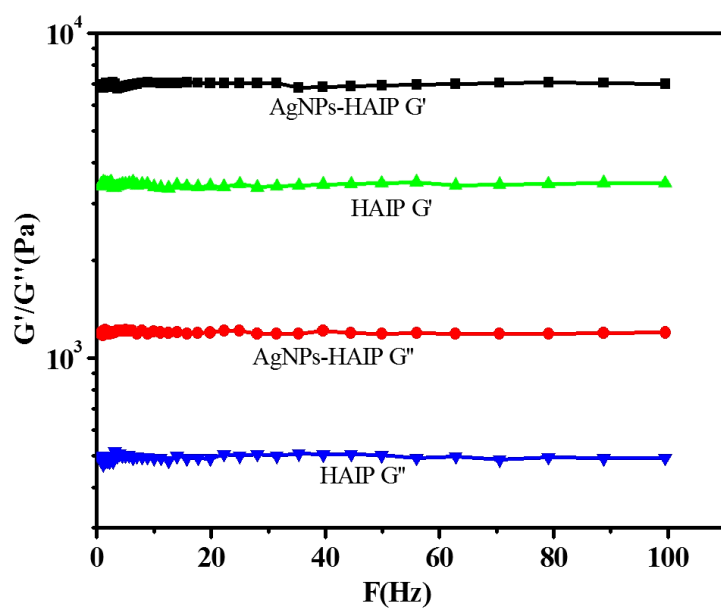

**Fig. S10** Dynamic frequency sweep of fresh HAIP gel and Ag NPs-HAIP gel at their respective MGC, measured at 0.1% strain.

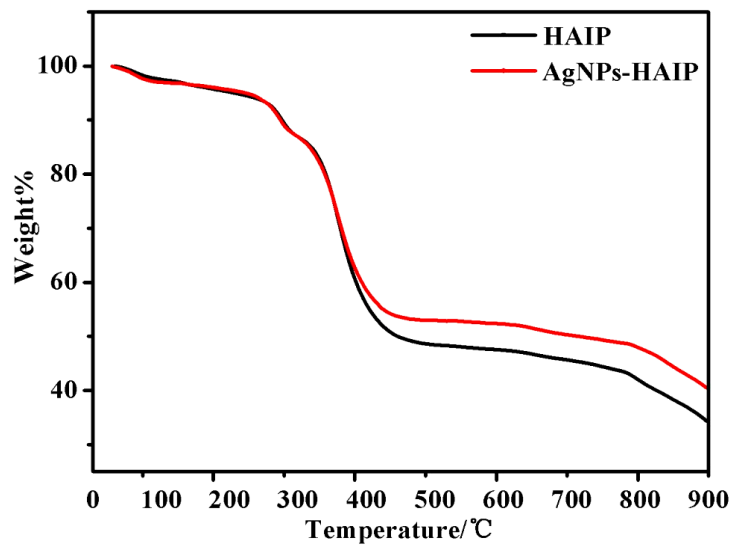

**Fig. S 11** TG curves of HAIP, and Ag NPs-HAIP xerogels. Thermal analysis system in a dynamic nitrogen atmosphere (heating rate: 10 °C/min, mass 1-3 mg, temperature range from room temperature up to 800 °C).

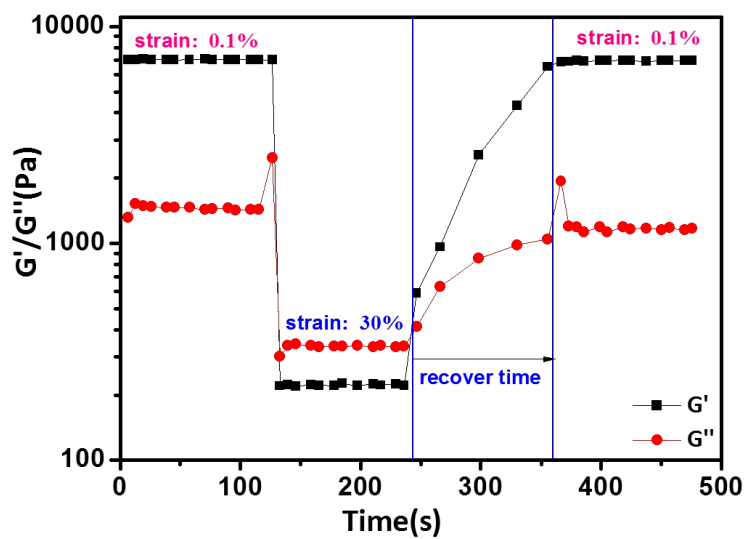

**Fig. S12** The step strain experimental data obtained from Ag NPs-HAIP gels at a constant frequency of 1 Hz.

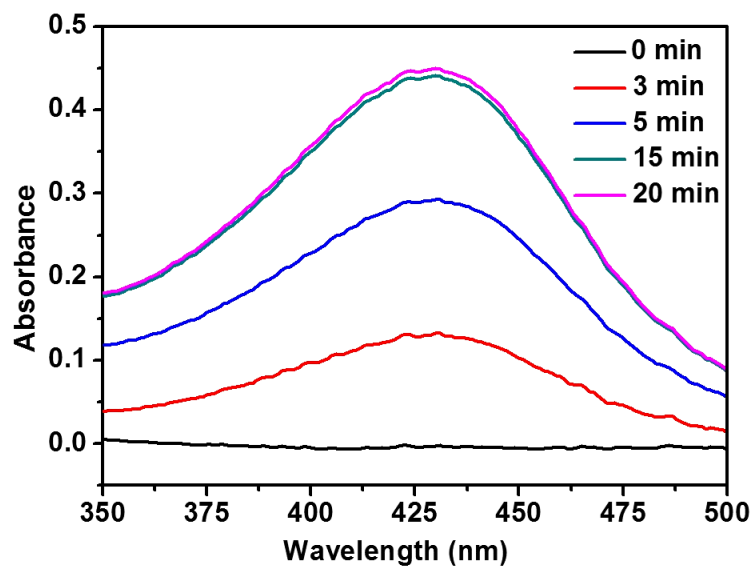

**Fig. S13** UV-vis absorption of deluted Ag NPs-HAIP xerogels formed at different time (dispersed in DMSO).

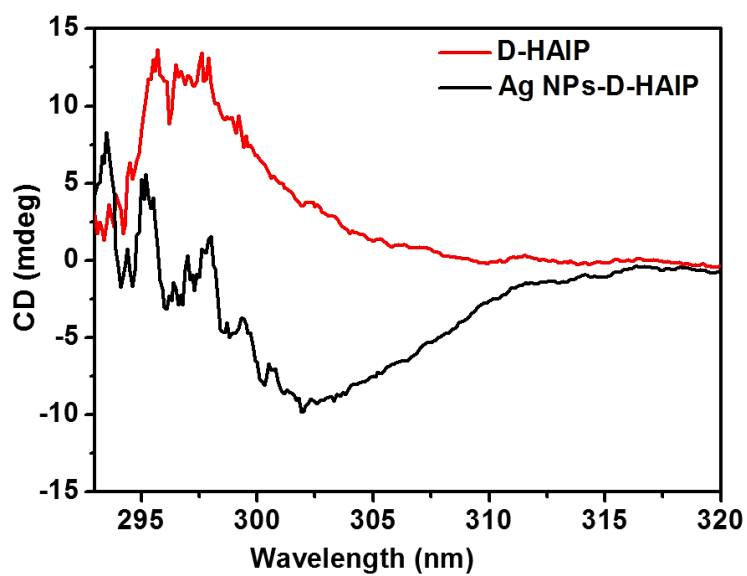

**Fig. S14** CD spectra of D-HAIP and Ag NPs-D-HAIP ( $C_{\text{HAIP}} = 2 \text{ mM}$ ).

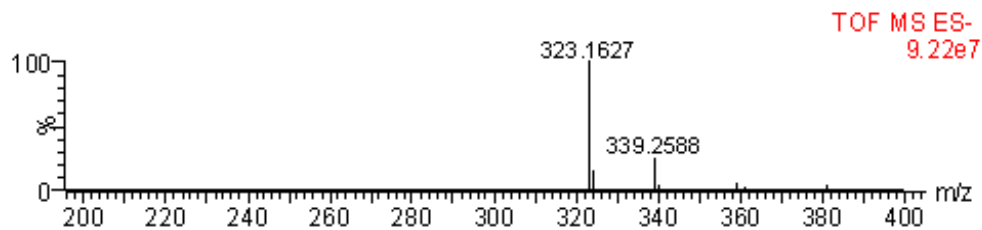

**Fig. S15** Electrospray ionization mass spectra of Ag NPs-HAIP.

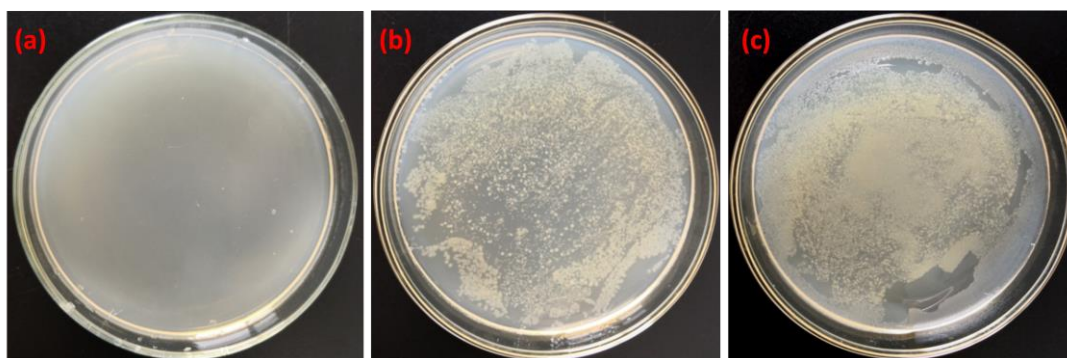

**Fig. S16** The digital photos of colonies from *E. coli* treated with (a) Ag NPs-HAIP ( $C_{Ag} = 0.1$  mM), (b) HAIP gel, (c) untreated, respectively.

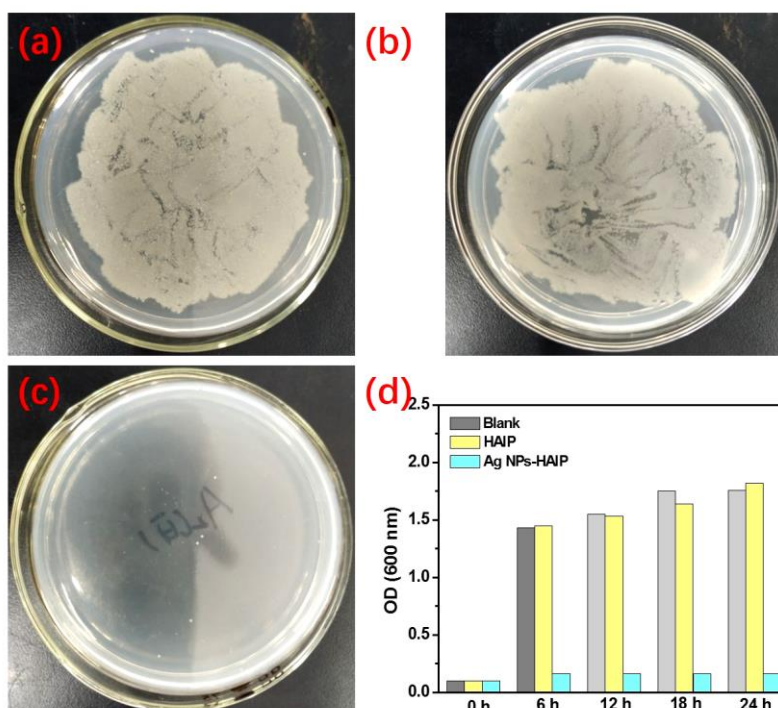

**Fig. S17** The digital photos of colonies from *S. albus* (a) untreated, treated with (b) HAIP gel, (c) Ag NPs-HAIP ( $C_{Ag} = 75 \mu\text{M}$ ), respectively, (d) Graphical representation of the OD measurements in *S. albus* at different time ( 0 h, 6 h, 12 h, 12 h, and 24 h, respectively).

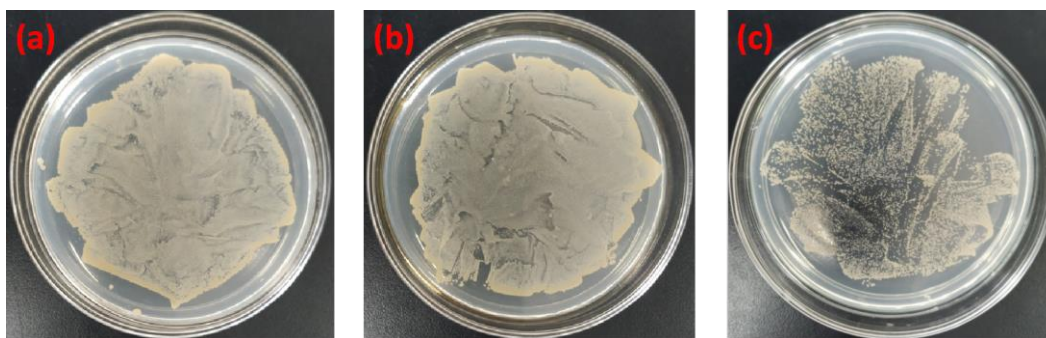

**Fig. S18** The digital photos of colonies from *S.aureus* (a) untreated, treated with (b) HAIP gel, (c) Ag NPs-HAIP ( $C_{Ag} = 0.1 \text{ mM}$ ), respectively.

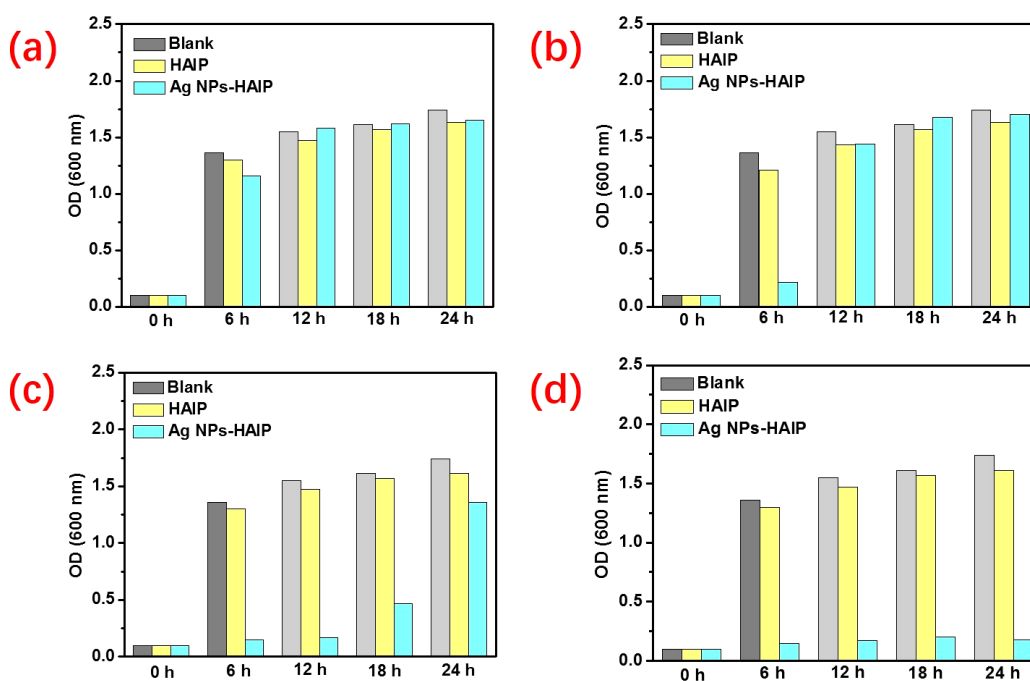

**Fig. S19** Graphical representation of the OD measurements in *S.aureus* at different concentrations of Ag (a) 50  $\mu\text{M}$ , (b) 100  $\mu\text{M}$ , (c) 200  $\mu\text{M}$ , and (d) 300  $\mu\text{M}$ .



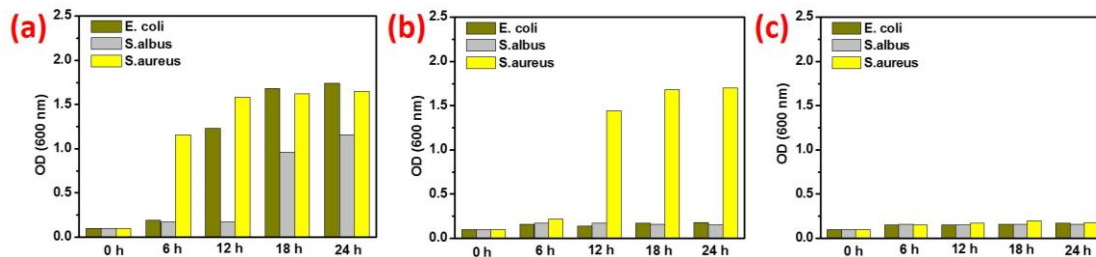

**Fig. S20** Graphical representation of the OD measurements in E.coli, S.albus, S.aureus at different concentrations (a) 50  $\mu$ M, (b) 100  $\mu$ M, and (c) 300  $\mu$ M ( 0 h, 6 h, 12 h, 18 h, and 24 h, respectively).

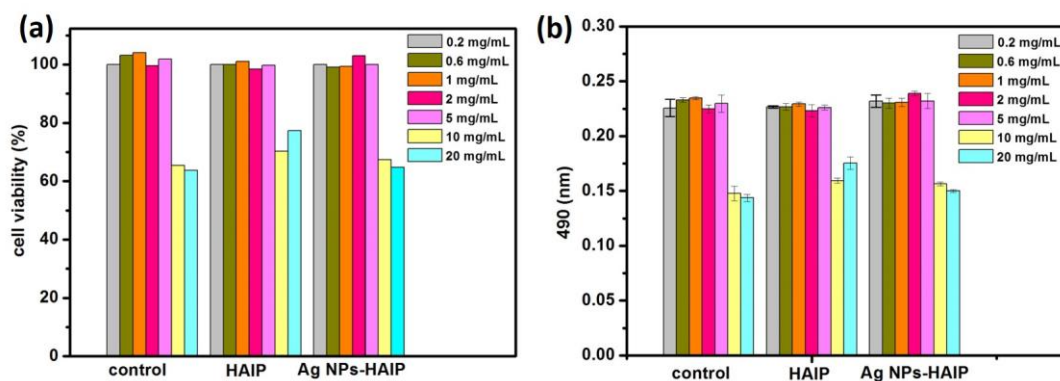

**Fig. S21** Graphical representation of the biocompatibility assays: (a) Cell viability, (b) OD measurements at 490 nm (MTT concentrations: 0.2 mg/mL, 0.6 mg/mL, 1 mg/mL, 2 mg/mL, 5 mg/mL, 10 mg/mL, 20 mg/mL, respectively).
